# Supplementary material for: Safety, Tolerability, and Immunogenicity of Booster Dose with MVC-COV1901 or MVC-COV1901-Beta SARS-CoV-2 Vaccine in Adults: A Phase I, Prospective, Randomized, Open-Labeled Study
Source: MDPI journal article supplement (doi:10.3390/vaccines11121798), 2023-12-01
Supplement: s1 [file s1]

### Group A WT Spike-specific IgG MBC

**V2**

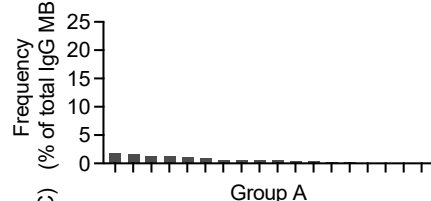

**V4**

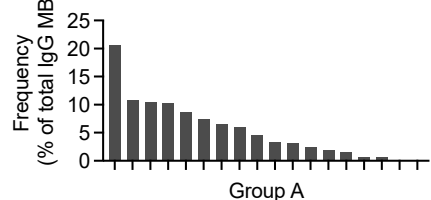

### Group B WT Spike-specific IgG MBC

**V2**

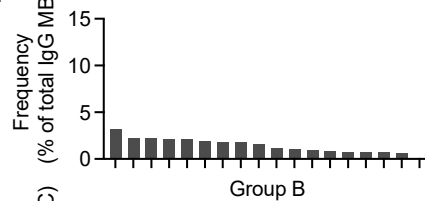

**V4**

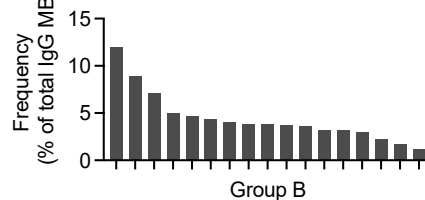

### Group A Beta Spike-specific IgG MBC

**V2**

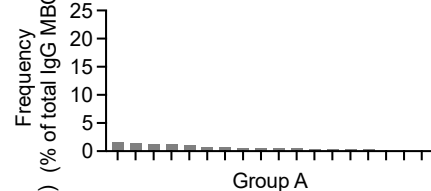

**V4**

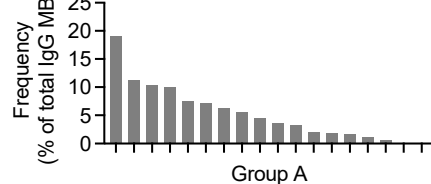

### Group B Beta Spike-specific IgG MBC

**V2**

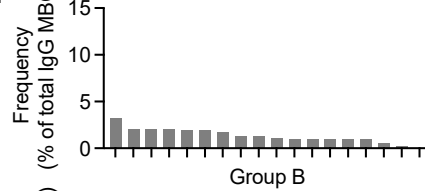

**V4**

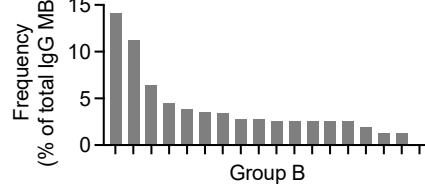

### Group A Omicron Spike-specific IgG MBC

**V2**

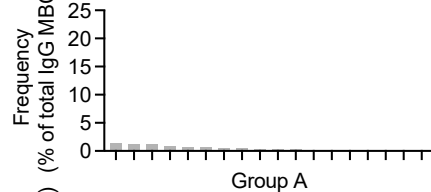

**V4**

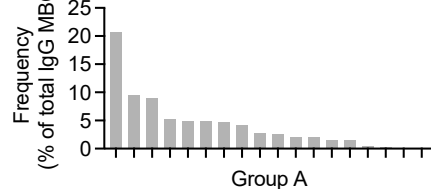

### Group B Omicron Spike-specific IgG MBC

**V2**

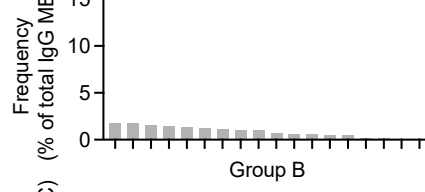

**V4**

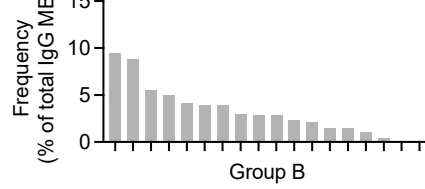

**Figure S1. Summary data of Spike-specific IgG memory B cell frequency prior to (V2) and 14 days after (V4) the booster dose in group A and B subjects.** Those who had two and three prior MVC-COV191 belonged to group A and B, respectively. WT, wild type. MBC, memory B cell

### Group A Spike-specific IgG MBC

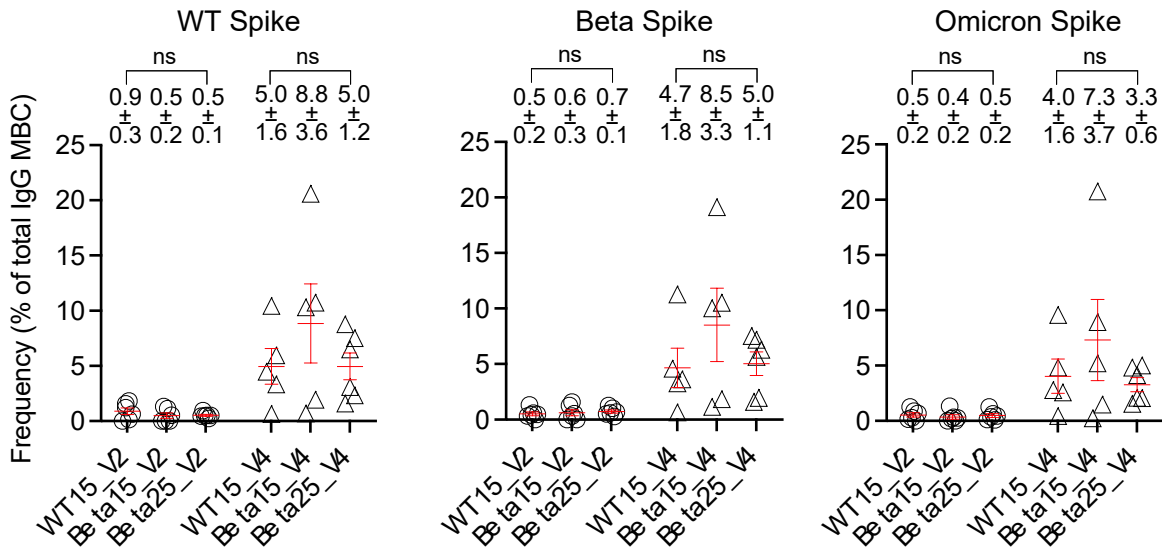

### Group B Spike-specific IgG MBC

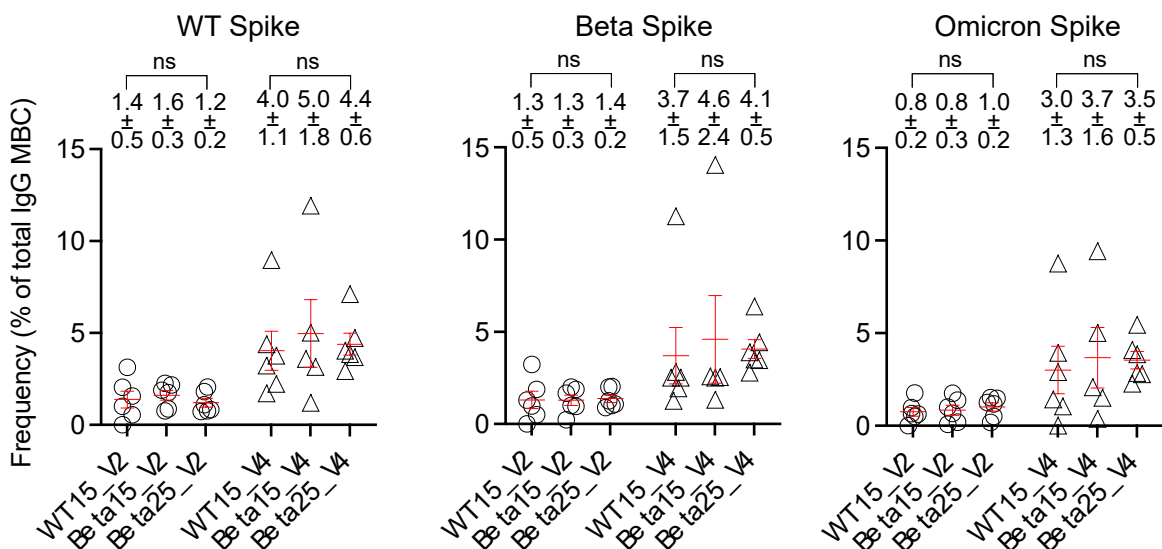

**Figure S2. Comparison of Spike-specific IgG MBC frequencies among subgroups in group A and B subjects.** There are three subgroups, i.e., booster dose with MVC-COV1901 containing Wuhan wild type Spike, booster dose with MVC-COV1901 containing Beta variant Spike 15  $\mu$ g, and booster dose with MVC-COV1901 containing Beta variant Spike 25  $\mu$ g, for each of group A and B. One-way ANOVA was used to compare the difference among subgroups. ns, not significant. V2, the vaccination day; V4, 14 days after the booster dose.

### Group A

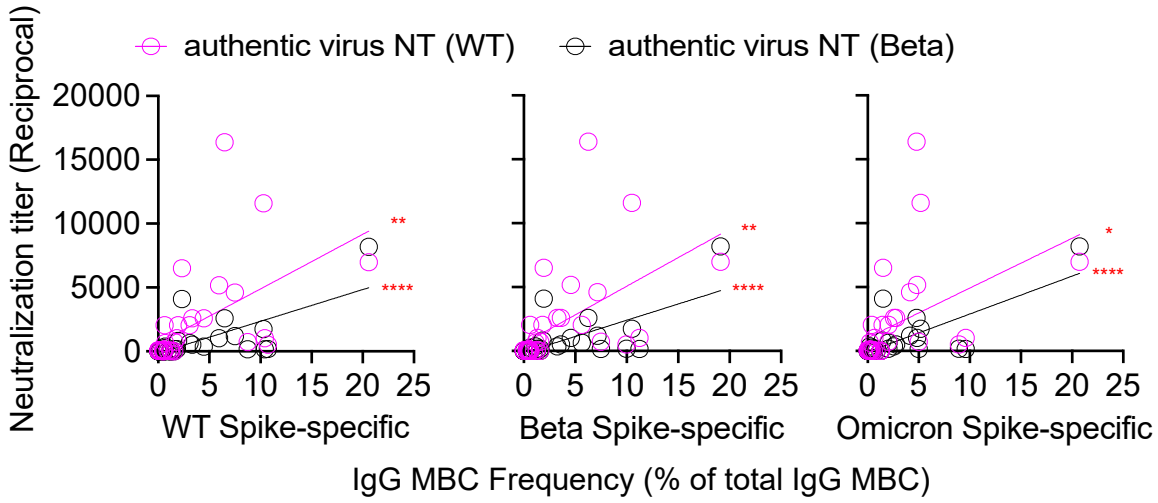

### Group B

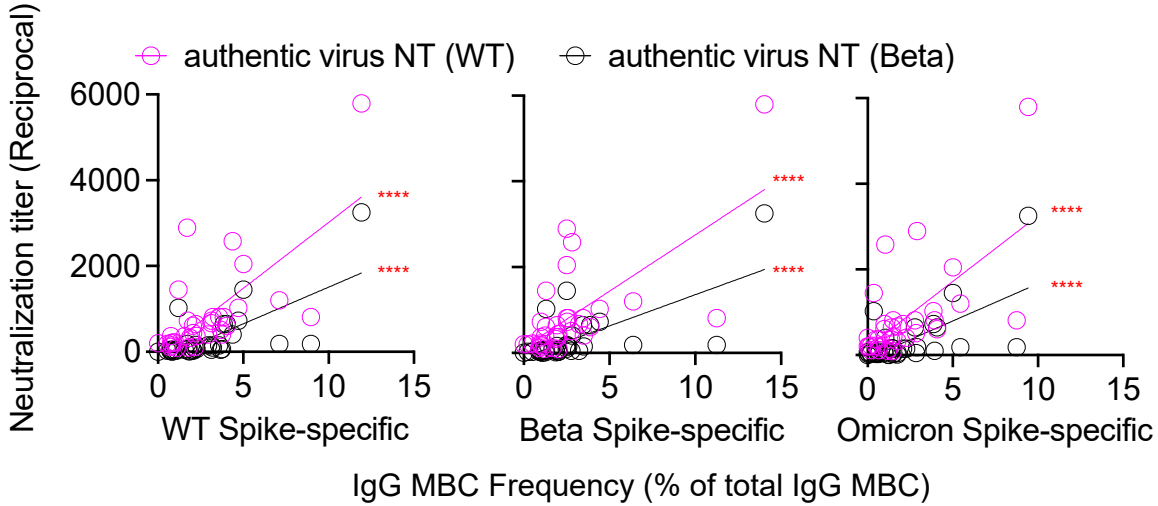

**Figure S3. Relationship of Spike-specific IgG MBC frequency and serological neutralization titer with authentic wild type and Beta variant viruses among group A and B subjects.** Linear regression was used to model the relationship between two variables. WT, wild type; NT, neutralization test. \* $p < 0.05$ , \*\* $p < 0.01$ , \*\*\*\* $p < 0.0001$ .

**A**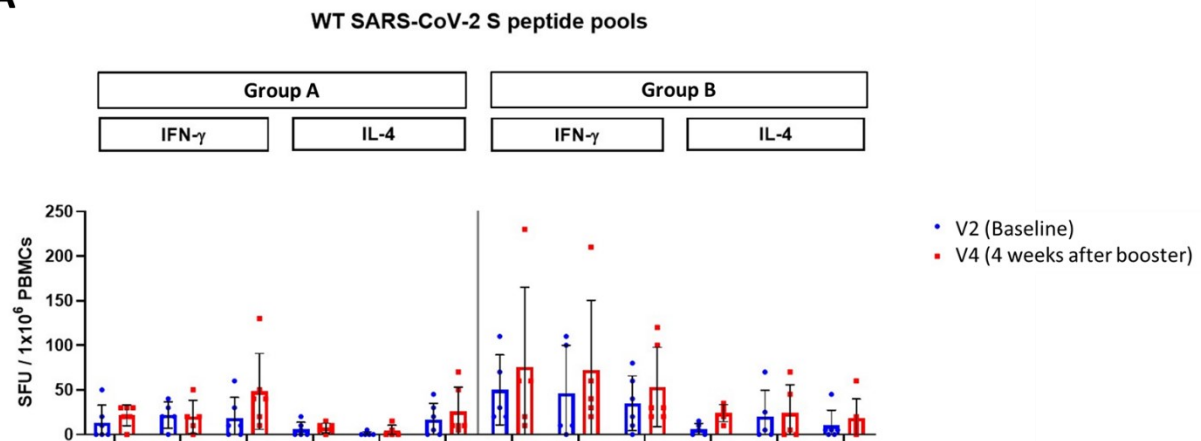**B**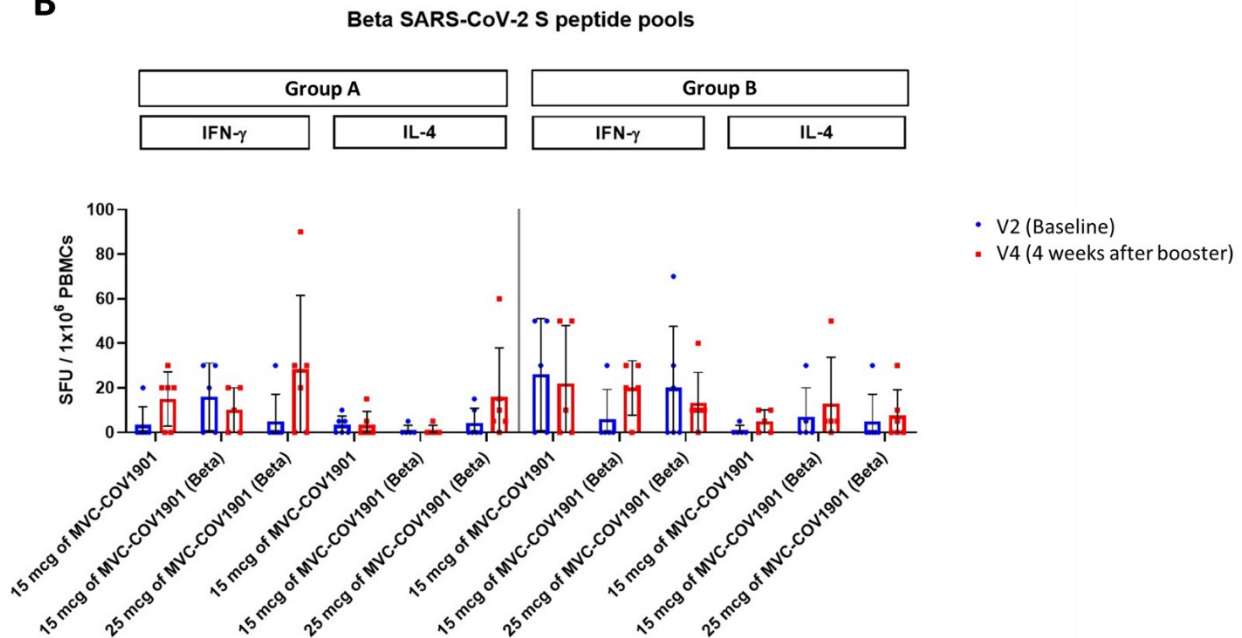

**Figure S4. Cytokine production induced by MVC-COV1901 or MVC-COV1901-Beta boosters.** PBMC samples were stimulated with peptide pools derived from the ancestral Wuhan (WT) or Beta variant spike protein of SARS-CoV-2. The results are shown in mean spot forming units (SFU) per million of PBMCs with error bars representing standard deviations.

**Table S1. Solicited Local Adverse Events after the Booster Dosing**

|                                | Group A:<br>Two Prior Doses of MVC-COV1901    |                                                     |                                                     |                                           | Group B:<br>Three Prior Doses of MVC-COV1901  |                                                     |                                                     |                                           |
|--------------------------------|-----------------------------------------------|-----------------------------------------------------|-----------------------------------------------------|-------------------------------------------|-----------------------------------------------|-----------------------------------------------------|-----------------------------------------------------|-------------------------------------------|
|                                | MVC-COV1901<br>(15 mcg)<br>(N = 15),<br>n (%) | MVC-COV1901<br>(15 mcg, Beta)<br>(N = 15),<br>n (%) | MVC-COV1901<br>(25 mcg, Beta)<br>(N = 15),<br>n (%) | All<br>Participants<br>(N = 45),<br>n (%) | MVC-COV1901<br>(15 mcg)<br>(N = 21),<br>n (%) | MVC-COV1901<br>(15 mcg, Beta)<br>(N = 21),<br>n (%) | MVC-COV1901<br>(25 mcg, Beta)<br>(N = 20),<br>n (%) | All<br>Participants<br>(N = 62),<br>n (%) |
| <b>Any Solicited Local AEs</b> | 10 (66.7)                                     | 11 (73.3)                                           | 9 (60.0)                                            | 30 (66.7)                                 | 13 (61.9)                                     | 12 (57.1)                                           | 14 (70.0)                                           | 39 (62.9)                                 |
| Grade 1                        | 10 (66.7)                                     | 11 (73.3)                                           | 8 (53.3)                                            | 29 (64.4)                                 | 13 (61.9)                                     | 11 (52.4)                                           | 14 (70.0)                                           | 38 (61.3)                                 |
| Grade 2                        | 0                                             | 0                                                   | 1 (6.7)                                             | 1 (2.2)                                   | 0                                             | 1 (4.8)                                             | 0                                                   | 1 (1.6)                                   |
| Grade 3                        | 0                                             | 0                                                   | 0                                                   | 0                                         | 0                                             | 0                                                   | 0                                                   | 0                                         |
| <b>Pain/Tenderness</b>         | 10 (66.7)                                     | 11 (73.3)                                           | 9 (60.0)                                            | 30 (66.7)                                 | 13 (61.9)                                     | 12 (57.1)                                           | 14 (70.0)                                           | 39 (62.9)                                 |
| Grade 1                        | 10 (66.7)                                     | 11 (73.3)                                           | 8 (53.3)                                            | 29 (64.4)                                 | 13 (61.9)                                     | 11 (52.4)                                           | 14 (70.0)                                           | 38 (61.3)                                 |
| Grade 2                        | 0                                             | 0                                                   | 1 (6.7)                                             | 1 (2.2)                                   | 0                                             | 1 (4.8)                                             | 0                                                   | 1 (1.6)                                   |
| Grade 3                        | 0                                             | 0                                                   | 0                                                   | 0                                         | 0                                             | 0                                                   | 0                                                   | 0                                         |
| <b>Erythema/Redness</b>        | 1 (6.7)                                       | 0                                                   | 1 (6.7)                                             | 2 (4.4)                                   | 0                                             | 0                                                   | 0                                                   | 0                                         |
| Grade 1                        | 1 (6.7)                                       | 0                                                   | 1 (6.7)                                             | 2 (4.4)                                   | 0                                             | 0                                                   | 0                                                   | 0                                         |
| Grade 2                        | 0                                             | 0                                                   | 0                                                   | 0                                         | 0                                             | 0                                                   | 0                                                   | 0                                         |
| Grade 3                        | 0                                             | 0                                                   | 0                                                   | 0                                         | 0                                             | 0                                                   | 0                                                   | 0                                         |
| <b>Induration/Swelling</b>     | 2 (13.3)                                      | 0                                                   | 3 (20.0)                                            | 5 (11.1)                                  | 0                                             | 1 (4.8)                                             | 1 (5.0)                                             | 2 (3.2)                                   |
| Grade 1                        | 2 (13.3)                                      | 0                                                   | 3 (20.0)                                            | 5 (11.1)                                  | 0                                             | 0                                                   | 1 (5.0)                                             | 1 (1.6)                                   |
| Grade 2                        | 0                                             | 0                                                   | 0                                                   | 0                                         | 0                                             | 1 (4.8)                                             | 0                                                   | 1 (1.6)                                   |
| Grade 3                        | 0                                             | 0                                                   | 0                                                   | 0                                         | 0                                             | 0                                                   | 0                                                   | 0                                         |

Abbreviations: N = number of subjects in the population; n = number of subjects in the specific category. % = percentage of subjects with N as the denominator.

**Table S2. Solicited Systemic Adverse Events after the Booster Dosing**

|                                   | Group A:<br>Two Prior Doses of MVC-COV1901    |                                                     |                                                     |                                           | Group B:<br>Three Prior Doses of MVC-COV1901  |                                                     |                                                     |                                           |
|-----------------------------------|-----------------------------------------------|-----------------------------------------------------|-----------------------------------------------------|-------------------------------------------|-----------------------------------------------|-----------------------------------------------------|-----------------------------------------------------|-------------------------------------------|
|                                   | MVC-COV1901<br>(15 mcg)<br>(N = 15),<br>n (%) | MVC-COV1901<br>(15 mcg, Beta)<br>(N = 15),<br>n (%) | MVC-COV1901<br>(25 mcg, Beta)<br>(N = 15),<br>n (%) | All<br>Participants<br>(N = 45),<br>n (%) | MVC-COV1901<br>(15 mcg)<br>(N = 21),<br>n (%) | MVC-COV1901<br>(15 mcg, Beta)<br>(N = 21),<br>n (%) | MVC-COV1901<br>(25 mcg, Beta)<br>(N = 20),<br>n (%) | All<br>Participants<br>(N = 62),<br>n (%) |
| <b>Any Solicited Systemic AEs</b> | 9 (60.0)                                      | 9 (60.0)                                            | 9 (60.0)                                            | 27 (60.0)                                 | 9 (42.9)                                      | 7 (33.3)                                            | 13 (65.0)                                           | 29 (46.8)                                 |
| Grade 1                           | 7 (46.7)                                      | 8 (53.3)                                            | 6 (40.0)                                            | 21 (46.7)                                 | 7 (33.3)                                      | 6 (28.6)                                            | 12 (60.0)                                           | 25 (40.3)                                 |
| Grade 2                           | 1 (6.7)                                       | 1 (6.7)                                             | 2 (13.3)                                            | 4 (8.9)                                   | 2 (9.5)                                       | 1 (4.8)                                             | 0                                                   | 3 (4.8)                                   |
| Grade 3                           | 1 (6.7)                                       | 0                                                   | 1 (6.7)                                             | 2 (4.4)                                   | 0                                             | 0                                                   | 1 (5.0)                                             | 1 (1.6)                                   |
| <b>Fever</b>                      | 1 (6.7)                                       | 0                                                   | 1 (6.7)                                             | 2 (4.4)                                   | 0                                             | 0                                                   | 1 (5.0)                                             | 1 (1.6)                                   |
| Grade 1                           | 1 (6.7)                                       | 0                                                   | 1 (6.7)                                             | 2 (4.4)                                   | 0                                             | 0                                                   | 0                                                   | 0                                         |
| Grade 2                           | 0                                             | 0                                                   | 0                                                   | 0                                         | 0                                             | 0                                                   | 1 (5.0)                                             | 1 (1.6)                                   |
| Grade 3                           | 0                                             | 0                                                   | 0                                                   | 0                                         | 0                                             | 0                                                   | 0                                                   | 0                                         |
| <b>Malaise/Fatigue</b>            | 5 (33.3)                                      | 7 (46.7)                                            | 8 (53.3)                                            | 20 (44.4)                                 | 7 (33.3)                                      | 6 (28.6)                                            | 8 (40.0)                                            | 21 (33.9)                                 |
| Grade 1                           | 3 (20.0)                                      | 7 (46.7)                                            | 5 (33.3)                                            | 15 (33.3)                                 | 5 (23.8)                                      | 5 (23.8)                                            | 7 (35.0)                                            | 17 (27.4)                                 |
| Grade 2                           | 1 (6.7)                                       | 0                                                   | 2 (13.3)                                            | 3 (6.7)                                   | 2 (9.5)                                       | 1 (4.8)                                             | 0                                                   | 3 (4.8)                                   |
| Grade 3                           | 1 (6.7)                                       | 0                                                   | 1 (6.7)                                             | 2 (4.4)                                   | 0                                             | 0                                                   | 1 (5.0)                                             | 1 (1.6)                                   |
| <b>Myalgia</b>                    | 4 (26.7)                                      | 3 (20.0)                                            | 5 (33.3)                                            | 12 (26.7)                                 | 5 (23.8)                                      | 1 (4.8)                                             | 7 (35.0)                                            | 13 (21.0)                                 |
| Grade 1                           | 3 (20.0)                                      | 2 (13.3)                                            | 4 (26.7)                                            | 9 (20.0)                                  | 5 (23.8)                                      | 1 (4.8)                                             | 7 (35.0)                                            | 13 (21.0)                                 |
| Grade 2                           | 1 (6.7)                                       | 1 (6.7)                                             | 1 (6.7)                                             | 3 (6.7)                                   | 0                                             | 0                                                   | 0                                                   | 0                                         |
| Grade 3                           | 0                                             | 0                                                   | 0                                                   | 0                                         | 0                                             | 0                                                   | 0                                                   | 0                                         |
| <b>Headache</b>                   | 5 (33.3)                                      | 2 (13.3)                                            | 4 (26.7)                                            | 11 (24.4)                                 | 3 (14.3)                                      | 3 (14.3)                                            | 4 (20.0)                                            | 10 (16.1)                                 |
| Grade 1                           | 4 (26.7)                                      | 2 (13.3)                                            | 3 (20.0)                                            | 9 (20.0)                                  | 3 (14.3)                                      | 3 (14.3)                                            | 3 (15.0)                                            | 9 (14.5)                                  |

|                        | Group A:<br>Two Prior Doses of MVC-COV1901    |                                                     |                                                     |                                           | Group B:<br>Three Prior Doses of MVC-COV1901  |                                                     |                                                     |                                           |
|------------------------|-----------------------------------------------|-----------------------------------------------------|-----------------------------------------------------|-------------------------------------------|-----------------------------------------------|-----------------------------------------------------|-----------------------------------------------------|-------------------------------------------|
|                        | MVC-COV1901<br>(15 mcg)<br>(N = 15),<br>n (%) | MVC-COV1901<br>(15 mcg, Beta)<br>(N = 15),<br>n (%) | MVC-COV1901<br>(25 mcg, Beta)<br>(N = 15),<br>n (%) | All<br>Participants<br>(N = 45),<br>n (%) | MVC-COV1901<br>(15 mcg)<br>(N = 21),<br>n (%) | MVC-COV1901<br>(15 mcg, Beta)<br>(N = 21),<br>n (%) | MVC-COV1901<br>(25 mcg, Beta)<br>(N = 20),<br>n (%) | All<br>Participants<br>(N = 62),<br>n (%) |
| Grade 2                | 1 (6.7)                                       | 0                                                   | 1 (6.7)                                             | 2 (4.4)                                   | 0                                             | 0                                                   | 1 (5.0)                                             | 1 (1.6)                                   |
| Grade 3                | 0                                             | 0                                                   | 0                                                   | 0                                         | 0                                             | 0                                                   | 0                                                   | 0                                         |
| <b>Nausea/Vomiting</b> | 2 (13.3)                                      | 1 (6.7)                                             | 2 (13.3)                                            | 5 (11.1)                                  | 0                                             | 0                                                   | 1 (5.0)                                             | 1 (1.6)                                   |
| Grade 1                | 1 (6.7)                                       | 1 (6.7)                                             | 2 (13.3)                                            | 4 (8.9)                                   | 0                                             | 0                                                   | 1 (5.0)                                             | 1 (1.6)                                   |
| Grade 2                | 1 (6.7)                                       | 0                                                   | 0                                                   | 1 (2.2)                                   | 0                                             | 0                                                   | 0                                                   | 0                                         |
| Grade 3                | 0                                             | 0                                                   | 0                                                   | 0                                         | 0                                             | 0                                                   | 0                                                   | 0                                         |
| <b>Diarrhea</b>        | 5 (33.3)                                      | 1 (6.7)                                             | 2 (13.3)                                            | 8 (17.8)                                  | 1 (4.8)                                       | 3 (14.3)                                            | 5 (25.0)                                            | 9 (14.5)                                  |
| Grade 1                | 4 (26.7)                                      | 1 (6.7)                                             | 2 (13.3)                                            | 7 (15.6)                                  | 1 (4.8)                                       | 2 (9.5)                                             | 5 (25.0)                                            | 8 (12.9)                                  |
| Grade 2                | 0                                             | 0                                                   | 0                                                   | 0                                         | 0                                             | 1 (4.8)                                             | 0                                                   | 1 (1.6)                                   |
| Grade 3                | 1 (6.7)                                       | 0                                                   | 0                                                   | 1 (2.2)                                   | 0                                             | 0                                                   | 0                                                   | 0                                         |

Abbreviations: N = number of subjects in the population; n = number of subjects in the specific category. % = percentage of subjects with N as the denominator.

**Table S3. Summary of Unsolicited Adverse Events and Other Adverse Events**

|                                                | Group A:<br>Two Prior Doses of MVC-COV1901    |                                                     |                                                     |                                           | Group B:<br>Three Prior Doses of MVC-COV1901  |                                                     |                                                     |                                           |
|------------------------------------------------|-----------------------------------------------|-----------------------------------------------------|-----------------------------------------------------|-------------------------------------------|-----------------------------------------------|-----------------------------------------------------|-----------------------------------------------------|-------------------------------------------|
|                                                | MVC-COV1901<br>(15 mcg)<br>(N = 15),<br>n (%) | MVC-COV1901<br>(15 mcg, Beta)<br>(N = 15),<br>n (%) | MVC-COV1901<br>(25 mcg, Beta)<br>(N = 15),<br>n (%) | All<br>Participants<br>(N = 45),<br>n (%) | MVC-COV1901<br>(15 mcg)<br>(N = 21),<br>n (%) | MVC-COV1901<br>(15 mcg, Beta)<br>(N = 21),<br>n (%) | MVC-COV1901<br>(25 mcg, Beta)<br>(N = 20),<br>n (%) | All<br>Participants<br>(N = 62),<br>n (%) |
| Unsolicited AEs                                | 4 (26.7)                                      | 6 (40.0)                                            | 5 (33.3)                                            | 15 (33.3)                                 | 6 (28.6)                                      | 8 (38.1)                                            | 3 (15.0)                                            | 17 (27.4)                                 |
| Related Unsolicited AEs                        | 1 (6.7)                                       | 1 (6.7)                                             | 2 (13.3)                                            | 4 (8.9)                                   | 2 (9.5)                                       | 2 (9.5)                                             | 2 (10.0)                                            | 6 (9.7)                                   |
| Unsolicited AEs $\geq$ Grade 3                 | 0                                             | 0                                                   | 0                                                   | 0                                         | 0                                             | 0                                                   | 0                                                   | 0                                         |
| Related Unsolicited AEs $\geq$ Grade 3         | 0                                             | 0                                                   | 0                                                   | 0                                         | 0                                             | 0                                                   | 0                                                   | 0                                         |
| AEs $\geq$ Grade 3                             | 0                                             | 0                                                   | 0                                                   | 0                                         | 0                                             | 0                                                   | 0                                                   | 0                                         |
| Related AEs $\geq$ Grade 3                     | 0                                             | 0                                                   | 0                                                   | 0                                         | 0                                             | 0                                                   | 0                                                   | 0                                         |
| SAEs                                           | 0                                             | 0                                                   | 0                                                   | 0                                         | 0                                             | 0                                                   | 0                                                   | 0                                         |
| Related SAEs                                   | 0                                             | 0                                                   | 0                                                   | 0                                         | 0                                             | 0                                                   | 0                                                   | 0                                         |
| AESI (including pIMD)                          | 0                                             | 0                                                   | 0                                                   | 0                                         | 0                                             | 0                                                   | 0                                                   | 0                                         |
| VAED                                           | 0                                             | 0                                                   | 0                                                   | 0                                         | 0                                             | 0                                                   | 0                                                   | 0                                         |
| AEs Leading to Intervention<br>Discontinuation | 0                                             | 0                                                   | 0                                                   | 0                                         | 0                                             | 0                                                   | 0                                                   | 0                                         |
| AEs Leading to Study Withdrawal                | 0                                             | 0                                                   | 0                                                   | 0                                         | 0                                             | 0                                                   | 0                                                   | 0                                         |
| Death                                          | 0                                             | 0                                                   | 0                                                   | 0                                         | 0                                             | 0                                                   | 0                                                   | 0                                         |

Abbreviations: N = number of subjects in the population; n = number of subjects with events; AE = Adverse Event; SAE = Serious Adverse Event; AESI = Adverse events of special interest; pIMD = potential immune mediated disorders; VAED = Vaccine-associated enhanced disease.



Table S4. Summary of immunogenicity data for Groups A and B

|                                                |             | Group A                        |                      |                                     |                      |                                     |                      |
|------------------------------------------------|-------------|--------------------------------|----------------------|-------------------------------------|----------------------|-------------------------------------|----------------------|
|                                                |             | MVC-COV1901<br>(15 mcg) (n=14) |                      | MVC-COV1901-Beta<br>(15 mcg) (n=12) |                      | MVC-COV1901-Beta<br>(25 mcg) (n=12) |                      |
|                                                |             | [GMT]                          | 95% CI               | [GMT]                               | 95% CI               | [GMT]                               | 95% CI               |
| WT (NT <sub>50</sub> )                         | V2 (Day 1)  | 61.28                          | (34.48, 108.91)      | 50.74                               | (27.26, 94.44)       | 42.47                               | (22.82, 79.03)       |
|                                                | V5 (Day 29) | 1352.00                        | (797.38, 2292.40)    | 1805.02                             | (1023.61, 3182.94)   | 3602.75                             | (2036.68, 6373.05)   |
| WT GMT ratio                                   | V5/V2       | 26.29                          | (15.51, 44.58)       | 35.10                               | (19.91, 61.90)       | 70.06                               | (39.61, 123.94)      |
| Beta (NT <sub>50</sub> )                       | V2 (Day 1)  | 9.75                           | (5.57, 17.08)        | 6.29                                | (3.43, 11.52)        | 5.99                                | (3.27, 10.98)        |
|                                                | V5 (Day 29) | 225.59                         | (128.13, 397.17)     | 931.34                              | (509.33, 1703.00)    | 1476.85                             | (806.39, 2704.76)    |
| Beta GMT ratio                                 | V5/V2       | 30.98                          | (17.60, 54.55)       | 127.92                              | (69.96, 233.91)      | 202.85                              | (110.76, 371.51)     |
| Omicron BA.1<br>(NT <sub>50</sub> )            | V2 (Day 1)  | 6.14                           | (3.21, 11.76)        | 4.00                                | (4.00, 4.00)         | 4.00                                | (4.00, 4.00)         |
|                                                | V5 (Day 29) | 116.28                         | (55.41, 244.04)      | 190.39                              | (85.92, 421.88)      | 609.68                              | (280.73, 1324.06)    |
| BA.1 GMT ratio                                 | V5/V2       | 18.93                          | (7.41, 48.33)        | 47.61                               | (22.49, 100.69)      | 152.47                              | (73.41, 316.40)      |
| Anti-spike IgG<br>(WT)                         | V2 (Day 1)  | 1384.95                        | (876.59, 2188.12)    | 1301.00                             | (793.82, 2132.21)    | 1073.76                             | (655.17, 1759.79)    |
|                                                | V4 (Day 15) | 25878.60                       | (17387.24, 38516.84) | 32938.41                            | (21459.28, 50558.02) | 43208.61                            | (28085.34, 66475.38) |
|                                                | V5 (Day 29) | 25257.76                       | (16360.67, 38993.18) | 30672.19                            | (19210.70, 48971.84) | 61907.00                            | (38676.11, 99091.57) |
| IgG GMT ratio**                                | V4/V2       | 20.65                          | (13.88, 30.74)       | 26.29                               | (17.13, 40.35)       | 34.48                               | (22.41, 53.05)       |
|                                                | V5/V2       | 20.16                          | (13.06, 31.12)       | 24.48                               | (15.33, 39.08)       | 49.41                               | (30.87, 79.08)       |
| Pseudovirus NT<br>ID <sub>50</sub> (WT)        | V2 (Day 1)  | 45.12                          | (98.07, 20.76)       | 35.97                               | (19.84, 65.21)       | 40.62                               | (26.33, 62.66)       |
|                                                | V4 (Day 15) | 1520.96                        | (1023.93, 2259.24)   | 1723.40                             | (1227.59, 2419.44)   | 2315.39                             | (1879.03, 2853.08)   |
| Pseudovirus NT<br>ID <sub>50</sub> (BA.4/BA.5) | V2 (Day 1)  | 14.50                          | (9.39, 22.38)        | 10.00                               | (10.00, 10.00)       | 10.93                               | (8.99, 13.30)        |
|                                                | V4 (Day 15) | 139.11                         | (76.16, 254.09)      | 240.10                              | (137.63, 418.86)     | 425.65                              | (272.79, 664.17)     |
| Pseudovirus NT<br>ID <sub>90</sub> (WT)        | V2 (Day 1)  | 18.53                          | (10.30, 33.33)       | 14.58                               | (10.82, 19.63)       | 14.05                               | (10.02, 19.68)       |
|                                                | V4 (Day 15) | 434.71                         | (267.37, 706.78)     | 558.18                              | (328.24, 949.20)     | 888.27                              | (551.22, 1431.43)    |
| Pseudovirus NT<br>ID <sub>90</sub> (BA.4/BA.5) | V2 (Day 1)  | 11.58                          | (9.33, 14.38)        | 10.00                               | (10.00, 10.00)       | 10.00                               | (10.00, 10.00)       |
|                                                | V4 (Day 15) | 54.52                          | (30.41, 97.75)       | 92.95                               | (57.80, 149.50)      | 157.99                              | (105.15, 237.39)     |

|                                                |             | Group B                        |                      |                                     |                      |                                     |                      |
|------------------------------------------------|-------------|--------------------------------|----------------------|-------------------------------------|----------------------|-------------------------------------|----------------------|
|                                                |             | MVC-COV1901<br>(15 mcg) (n=17) |                      | MVC-COV1901-Beta<br>(15 mcg) (n=18) |                      | MVC-COV1901-Beta<br>(25 mcg) (n=18) |                      |
|                                                |             | [GMT]                          | 95% CI               | [GMT]                               | 95% CI               | [GMT]                               | 95% CI               |
| WT (NT <sub>50</sub> )                         | V2 (Day 1)  | 292.89                         | (220.46, 389.11)     | 253.89                              | (192.56, 334.76)     | 263.29                              | (198.18, 349.79)     |
|                                                | V5 (Day 29) | 867.93                         | (629.98, 1195.74)    | 1124.98                             | (824.29, 1535.36)    | 928.54                              | (680.78, 1266.48)    |
| WT GMT ratio                                   | V5/V2       | 3.25                           | (2.36, 4.47)         | 4.21                                | (3.08, 5.74)         | 3.47                                | (2.55, 4.74)         |
| Beta (NT <sub>50</sub> )                       | V2 (Day 1)  | 34.02                          | (21.76, 53.19)       | 25.09                               | (16.24, 38.77)       | 31.17                               | (19.94, 48.74)       |
|                                                | V5 (Day 29) | 147.14                         | (102.32, 211.61)     | 459.23                              | (322.19, 654.56)     | 323.78                              | (227.68, 460.43)     |
| Beta GMT ratio                                 | V5/V2       | 5.03                           | (3.49, 7.23)         | 15.69                               | (11.01, 22.36)       | 11.06                               | (7.78, 15.73)        |
| Omicron BA.1<br>(NT <sub>50</sub> )            | V2 (Day 1)  | 8.92                           | (5.48, 14.51)        | 6.77                                | (4.34, 10.56)        | 8.67                                | (5.55, 13.52)        |
|                                                | V5 (Day 29) | 54.9                           | (36.50, 82.58)       | 124.87                              | (69.21, 225.29)      | 84.89                               | (49.50, 145.58)      |
| BA.1 GMT ratio                                 | V5/V2       | 6.15                           | (3.34, 11.34)        | 18.45                               | (9.05, 37.56)        | 9.8                                 | (4.99, 19.20)        |
| Anti-spike IgG<br>(WT)                         | V2 (Day 1)  | 6712.17                        | (5261.78, 8562.35)   | 4620.77                             | (3645.90, 5856.32)   | 5307.28                             | (4160.46, 6770.21)   |
|                                                | V4 (Day 15) | 21078.01                       | (15675.17, 28343.06) | 28179.38                            | (21170.75, 37508.24) | 21638.16                            | (16216.34, 28872.72) |
|                                                | V5 (Day 29) | 19014.66                       | (14364.79, 25169.70) | 24953.2                             | (19040.94, 32701.23) | 21889.96                            | (16782.37, 28552.02) |
| IgG GMT ratio**                                | V4/V2       | 3.86                           | (2.87, 5.19)         | 5.16                                | (3.87, 6.87)         | 3.96                                | (2.97, 5.28)         |
|                                                | V5/V2       | 3.48                           | (2.63, 4.61)         | 4.57                                | (3.49, 5.99)         | 4.01                                | (3.07, 5.23)         |
| Pseudovirus NT<br>ID <sub>50</sub> (WT)        | V2 (Day 1)  | 611.33                         | (400.87, 932.27)     | 388.14                              | (271.86, 554.15)     | 408.18                              | (254.72, 654.10)     |
|                                                | V4 (Day 15) | 1831.75                        | (1449.69, 2314.49)   | 1919.17                             | (1595.53, 2308.44)   | 1919.51                             | (1613.19, 2284.00)   |
| Pseudovirus NT<br>ID <sub>50</sub> (BA.4/BA.5) | V2 (Day 1)  | 33.28                          | (23.69, 46.76)       | 22.31                               | (15.16, 32.83)       | 25.66                               | (19.46, 33.84)       |
|                                                | V4 (Day 15) | 136.83                         | (93.16, 200.95)      | 222.44                              | (135.10, 366.22)     | 154.62                              | (109.03, 219.28)     |
| Pseudovirus NT<br>ID <sub>90</sub> (WT)        | V2 (Day 1)  | 108.97                         | (82.54, 143.87)      | 81.60                               | (60.18, 110.66)      | 92.07                               | (64.51, 131.40)      |
|                                                | V4 (Day 15) | 428.68                         | (308.92, 594.85)     | 533.7                               | (360.77, 789.53)     | 417.94                              | (328.33, 532.01)     |
| Pseudovirus NT<br>ID <sub>90</sub> (BA.4/BA.5) | V2 (Day 1)  | 11.85                          | (9.69, 14.50)        | 11.46                               | (9.80, 13.42)        | 11.35                               | (9.82, 13.12)        |
|                                                | V4 (Day 15) | 50.83                          | (35.40, 72.98)       | 84.52                               | (55.02, 129.83)      | 63.74                               | (46.65, 87.10)       |
